# Supplementary material for: Simultaneous and co-located wind measurements in the middle atmosphere by lidar and rocket-borne techniques
Source: Copernicus journal article supplement (doi:10.5194/amt-2016-106), 2016-04-05
Supplement: Supplementary file [file amt-2016-106-AC1-supplement.pdf]

1 **Reviewer No. 1**

2 Response to the report of the reviewer to our paper:

3  
4 ‘Simultaneous and co-located wind measurements in the middle atmosphere by lidar  
5 and rocket-borne techniques’

6 by Franz-Josef Lübken, Gerd Baumgarten, Jens Hildebrand, and Francis J. Schmidlin  
7 submitted for publication in *Atmos. Meas. Tech.*, 2016.

8  
9 Manuscript Number: amt-2016-106

10 **Introductory remarks:**

11 We appreciate the comments from the reviewer. We have taken his/her suggestions for  
12 improvements into account when preparing the revised version of the manuscript. In  
13 the following we respond to the reviewer’s comments point by point. We have marked  
14 the changes in the revised version of the manuscript.

- 15
- 16 1. We fully agree with the reviewer who has summarized correctly the fundamental  
17 difference between lidar (Eulerian) and insitu (Lagrangian) observations. Follow-  
18 ing his/her suggestions we have inserted a comment on this topic at the beginning  
19 of section 5.
  - 20 2. We thank the reviewer for addressing this topic in such detail. He/she is correct  
21 in stating that there are no vertical wind observations available during our cam-  
22 paign. Even worse, we don’t know of any technique measuring(!) vertical winds in  
23 the mesosphere/upper stratosphere. Some few exceptions basically involve radar  
24 techniques (mainly EISCAT) in the upper mesosphere/lower thermosphere and  
25 the foil cloud technique introduced by Hans Widdel (‘Vertical movements in the  
26 middle atmosphere derived from foil cloud experiments’, *J. Atmos. Terr. Phys.*,  
27 49, 723–742, 1987). Both techniques suffer from significant uncertainties. The  
28 other examples cited by the reviewer are from models and may be not be correct  
29 or not be applicable in our situation. On a long term average (more than some  
30 hours) vertical winds are presumably very small (mm/s to cm/s) and are mainly  
31 determined by the residual circulation. As the reviewer pointed out correctly, we  
32 can safely ignore these small vertical winds. On shorter terms, vertical winds are  
33 expected to be significantly larger, for example as generated by gravity waves.  
34 Therefore, some of the gravity wave features detected in our observations may  
35 indeed be due to vertical winds. As mentioned in the paper, we will perform  
36 a more detailed analysis of the gravity wave signatures in a later paper. For  
37 starutes and radiosondes, we will have to consider gravity wave modulations of  
38 background densities also, since they modify vertical movements (we will apply

39 the polarization relations for gravity waves for this purpose). In summary, the  
40 suggestion by this reviewer is well taken and will be considered in a future paper.  
41 We have added a note on this topic in the revised version of our paper.

42 3. It is indeed a good idea to characterize the apparent gravity wave features in more  
43 detail using hodograph methods. Again, we refer to the main aim of our paper,  
44 namely a comparison of instrumental techniques, whereas a detailed analysis of  
45 the entire wave field will be performed in a later paper. We hope for the under-  
46 standing of the reviewer. We have added a short note regarding the hodograph  
47 technique.

48 4. The reviewer is correct: scattering due to air molecules only (without aerosols)  
49 was derived from Raman scattering on N<sub>2</sub> at 608 nm. We have added a note in  
50 the manuscript.

#### 51 Technical corrections

52 (1) The reviewer is correct that the launches from 4/5 March and 10 March are not  
53 used in this paper. Still, we would like to keep them in Table 1 because i) it  
54 demonstrates the overall success rate of the starute flights, and b) the Table may  
55 be used for future reference.

56 (2) We have corrected the typos.

57 (3) a.: In the revised version we have added a drawing of a starute where the ‘burble  
58 fence’ can easily be identified. The purpose of this device is explained in the main  
59 text.

60 b.: We have changed the wording.

61 (4) We have inserted commas, as suggested.

62 (5) We have removed commas, as suggested.

63 (6) We agree and have changed the wording.

64 K hlungsborn, July 11, 2016.

Franz-Josef L bken (for all coauthors)

65 **Reviewer No. 2**

66 Response to the report of the reviewer to our paper:

67  
68 ‘Simultaneous and co-located wind measurements in the middle atmosphere by lidar  
69 and rocket-borne techniques’

70 by Franz-Josef Lübken, Gerd Baumgarten, Jens Hildebrand, and Francis J. Schmidlin  
71 submitted for publication in *Atmos. Meas. Tech.*, 2016.

72  
73 Manuscript Number: amt-2016-106

74 **Introductory remarks:**

75 We appreciate the comments from the reviewer. We have taken his/her suggestions for  
76 improvements into account when preparing the revised version of the manuscript. In  
77 the following we respond to the reviewer’s comments point by point. We have marked  
78 the changes in the revised version of the manuscript.

79  
80 *Specific comments:*

81  
82 • *‘Comparison during daylight’*

83 We have performed a few flights during daylight conditions some years ago but  
84 haven’t put too much emphasis on analyzing these flights (yet) due to some tech-  
85 nical problems with the starutes and also with DoRIS at that time. We think,  
86 however, that winds from DoRIS are also reliable during daylight conditions, since  
87 there is no apparent ‘jump’ in the wind field at the transition between day and  
88 night, and vice versa (see Figures 1 and 3 in the Baumgarten et al. paper from  
89 2016). We have added a short note on this topic.

90 • *‘Uncertainty due to radar tracking’*

91 The basic information on the position of the starute comes a radar tracking the  
92 starute. If that radar track is uncertain, e. g. because of improper identifying and  
93 following the target, this results in errors in positioning the starute and thereby in  
94 uncertainties of the winds derived from the trajectory. A deeper analysis is given  
95 in the Schmidlin et al. paper mentioned in the paper (this manuscript is part  
96 of the ESA proceedings from a long-standing symposium on rocket and balloon  
97 borne techniques). In our case, we have estimated this uncertainty to be on the  
98 order of  $\pm 0.5$ – $1.5$  m/s, depending on the performance of the starute.

99 • *‘Vertical winds from DoRIS?’*

100 DoRIS can in principle measure vertical winds if we point one (or better both)  
101 telescopes into the vertical direction. However, mean vertical winds are much

102 smaller compared to horizontal winds and vertical winds cannot be obtained from  
103 starutes (only horizontal winds). We therefore pointed the telescopes as much as  
104 possible to the horizontal. The maximum zenith angle of the telescopes is 30  
105 degrees and is given by mechanical constraints of the supporting structures.

106 ● *'Datasondes'*

107 We have added a drawing of a starute in the revised version which hopefully  
108 makes it easier to understand how this system works. The basic performance and  
109 the purpose of the 'burble fence' is explained in the main text.

110 ● *'Uncertainty at 30/40 km'*

111  
112 As requested, we have added a note regarding the error bars below 40 km

113 ● *'What is shown in Figure 7'*

114 We wanted to demonstrate the natural variability of the wind field as measured  
115 by DoRIS within a certain time period of  $\pm 30$  min around a given datasonde flight  
116 (SL6 in the case of Figure 7). We think that this is an important information  
117 when considering any potential difference between DoRIS and starute winds since  
118 these measurements are not made at exactly the same location and not exactly  
119 at the same point in time (e.g., due to time averaging of the DoRIS profiles). We  
120 have replaced the word 'repeatability' by 'natural variability' in the text.

121 *Minor comments*

122 ● *'First sentence in the abstract'*

123 We agree with the reviewer and have modified the first sentence in the abstract.

124 ● *'upper stratosphere ?'*

125 We agree and have added 'middle' in the revised version.

126 K hlungsborn, July 11, 2016.

Franz-Josef L bken (for all coauthors)
